# Supplementary material for: Association Between the Sulfur Microbial Diet and Risk of Colorectal Cancer
Source: PubMed Central journal article supplement (PMC8590167; doi:10.1001/jamanetworkopen.2021.34308), 2021-11-12
Supplement: jamanetwopen-e2134308-s001.pdf [file jamanetwopen-e2134308-s001.pdf]

## Supplementary Online Content

Wang Y, Nguyen LH, Mehta RS, Song M, Huttenhower C, Chan AT. Association between the sulfur microbial diet and risk of colorectal cancer. *JAMA Netw Open*. 2021;4(11):e2134308. doi:10.1001/jamanetworkopen.2021.34308

**eFigure.** Sample Flow Diagram

**eTable 1.** List of Sulfur-Metabolizing Bacteria

**eTable 2.** Age-Adjusted Baseline Characteristics (2013) of the Men's Lifestyle Validation Study (MLVS) and Mind Body Study (MBS) Participants

**eTable 3.** Representative Food Items for Food Groups Included in the Sulfur Microbial Diet Score

**eTable 4.** Age-Adjusted Baseline Dietary Intakes in Servings per Week Among Men [Health Professionals Follow-up Study (HPFS)] and Women [Nurses' Health Study (NHS) and Nurses' Health Study II (NHS2)] by Quintiles of Sulfur Microbial Diet Score

**eTable 5.** Hazard Ratios (HR) and 95% Confidence Intervals (CI) of Colorectal Cancer Incidence in Men [Health Professionals Follow-up Study (HPFS)] and Women [Nurses' Health Study (NHS) and Nurses' Health Study II (NHS2)] by Quintiles of Sulfur Microbial Diet Score

**eTable 6.** Multivariable-Adjusted Association Between the Sulfur Microbial Diet Score and Colorectal Cancer Incidence in the Pooled Analytic Cohort of Health Professionals Follow-up Study (HPFS), Nurses' Health Study (NHS), and Nurses' Health Study II (NHS2), With Additional Adjustment for the Western Dietary Pattern Score

This supplementary material has been provided by the authors to give readers additional information about their work.

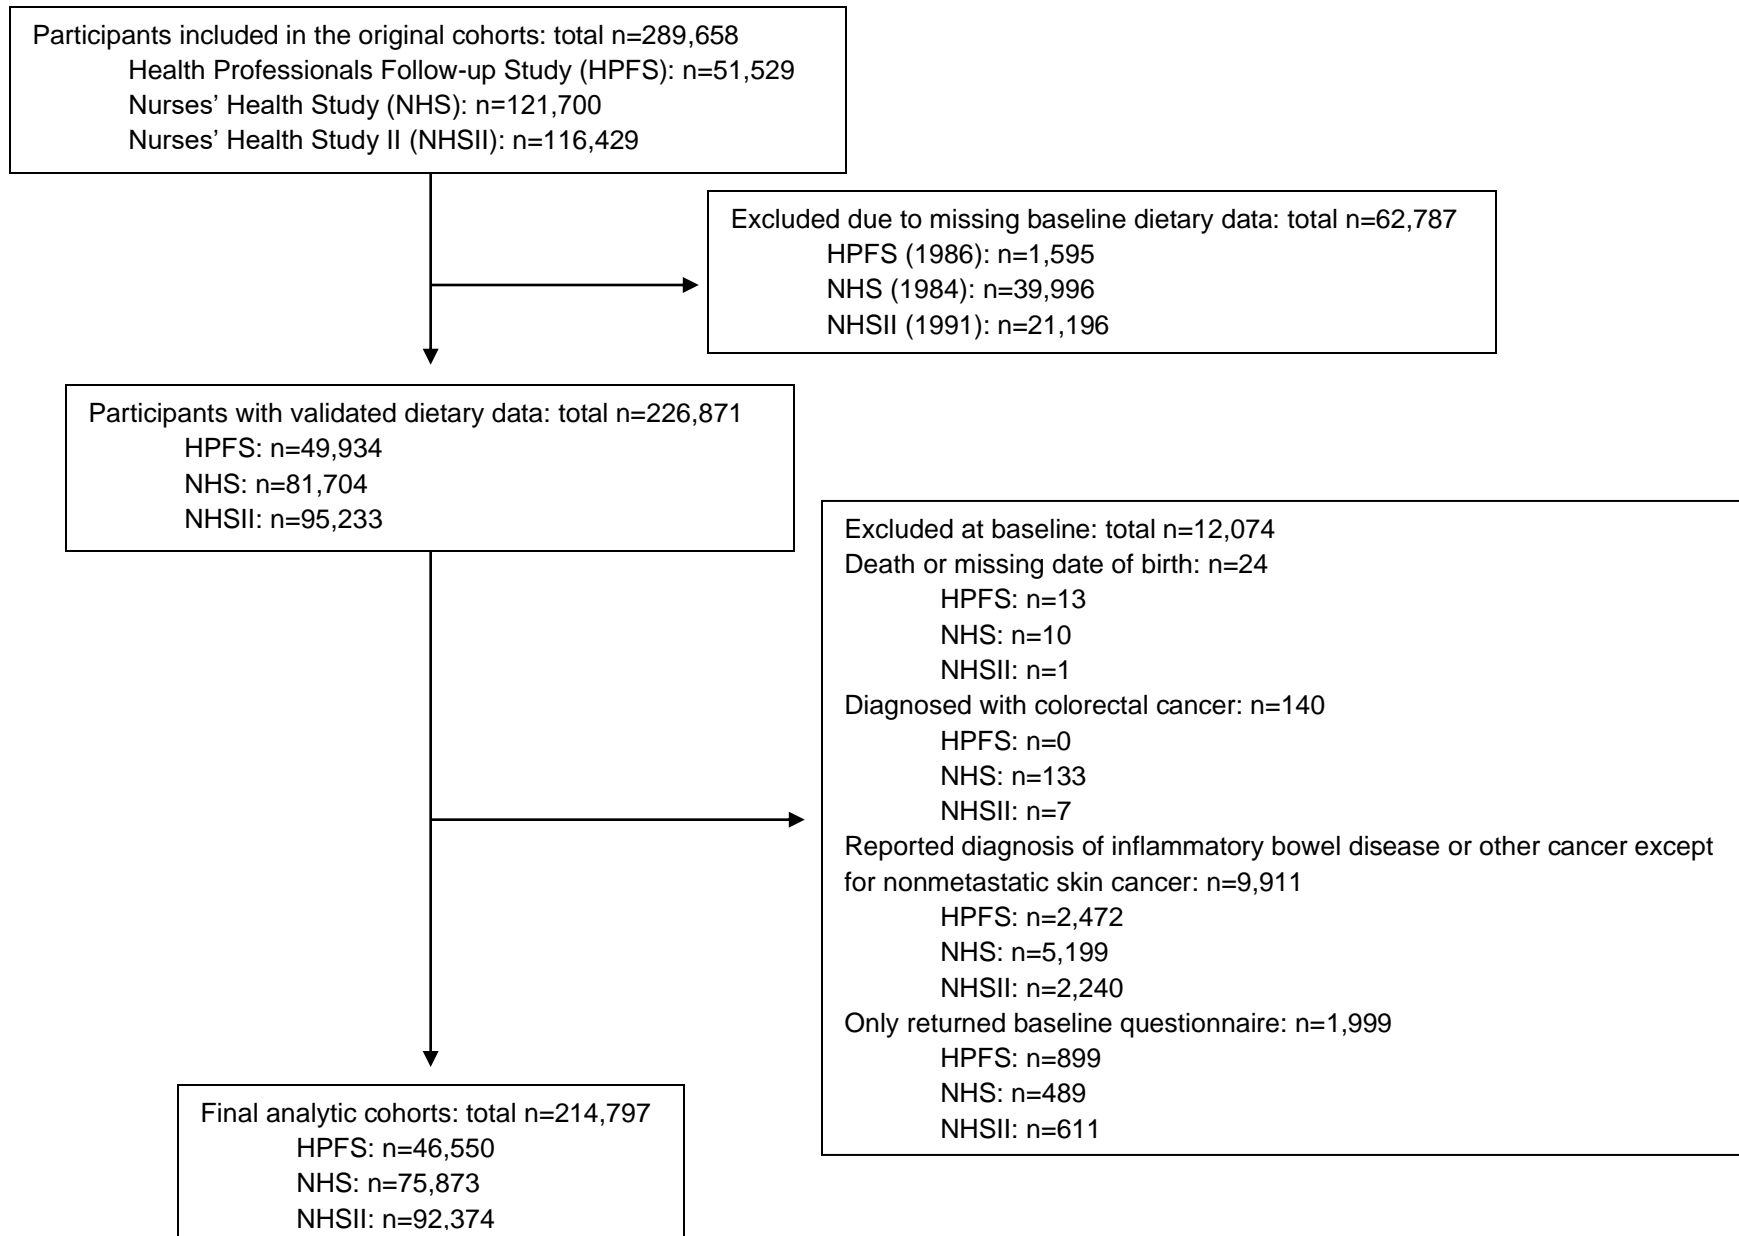

**eFigure.** Sample Flow Diagram

| <b>eTable 1. List of Sulfur-Metabolizing Bacteria</b> |
|-------------------------------------------------------|
| <i>Acidaminococcus unclassified</i>                   |
| <i>Adlercreutzia equolifaciens</i>                    |
| <i>Alistipes finegoldii</i>                           |
| <i>Alistipes putredinis</i>                           |
| <i>Anaerotruncus colihominis</i>                      |
| <i>Bacteroides clarus</i>                             |
| <i>Bacteroides intestinalis</i>                       |
| <i>Bacteroides ovatus</i>                             |
| <i>Bacteroides plebeius</i>                           |
| <i>Bacteroides stercoris</i>                          |
| <i>Bacteroides uniformis</i>                          |
| <i>Bacteroides vulgatus</i>                           |
| <i>Bilophila unclassified</i>                         |
| <i>Bilophila wadsworthia</i>                          |
| <i>Burkholderiales bacterium 1 1 47</i>               |
| <i>Clostridiales bacterium 1 7 47FAA</i>              |
| <i>Coprococcus catus</i>                              |
| <i>Desulfovibrio desulfuricans</i>                    |
| <i>Eggerthella lenta</i>                              |
| <i>Erysipelotrichaceae bacterium 2 1 3</i>            |
| <i>Erysipelotrichaceae bacterium 6 1 45</i>           |
| <i>Eubacterium ramulus</i>                            |
| <i>Eubacterium rectale</i>                            |
| <i>Gordonibacter pamelaee</i>                         |
| <i>Lachnospiraceae bacterium 5 1 63FAA</i>            |
| <i>Odoribacter splanchnicus</i>                       |
| <i>Oxalobacter formigenes</i>                         |
| <i>Parabacteroides distasonis</i>                     |
| <i>Parabacteroides goldsteinii</i>                    |
| <i>Parabacteroides johnsonii</i>                      |
| <i>Parabacteroides merdae</i>                         |
| <i>Parabacteroides unclassified</i>                   |
| <i>Paraprevotella clara</i>                           |
| <i>Paraprevotella xylaniphila</i>                     |
| <i>Parasutterella excrementihominis</i>               |
| <i>Roseburia intestinalis</i>                         |
| <i>Ruminococcus bromii</i>                            |
| <i>Streptococcus australis</i>                        |
| <i>Streptococcus vestibularis</i>                     |
| <i>Sutterella wadsworthensis</i>                      |
| <i>Veillonella atypica</i>                            |
| <i>Veillonella parvula</i>                            |
| <i>Veillonella unclassified</i>                       |

**eTable 2.** Age-Adjusted Baseline Characteristics (2013) of the Men's Lifestyle Validation Study (MLVS) and Mind Body Study (MBS) Participants, Mean (SD) or %

|                                       | MLVS           | MBS            |
|---------------------------------------|----------------|----------------|
| Age, years <sup>a</sup>               | 70.5 (4.3)     | 61.0 (3.8)     |
| White race, %                         | 94.5           | 95.8           |
| BMI (kg/m <sup>2</sup> )              | 25.5 (3.7)     | 25.6 (5.3)     |
| Physical activity, MET-hours/week     | 48.2 (36.2)    | 25.7 (18.7)    |
| Current smoker, %                     | 1.0            | 2.3            |
| Antibiotic use in past year, %        | 18.6           | 25.4           |
| Bowel preparation in past 2 months, % | 5.2            | 1.9            |
| Probiotic use in past 2 months, %     | 8.5            | 16.4           |
| Total calorie intake, kcal/day        | 2169.4 (698.1) | 1398.8 (467.4) |
| Bristol stool scale                   |                |                |
| Hard stool (Type 1-2), %              | 5.2            | 14.6           |
| Normal stool (Type 3-5), %            | 87.3           | 69.0           |
| Loose stool (Type 6-7), %             | 7.5            | 14.1           |
| Alcohol intake                        |                |                |
| Never, %                              | 13.5           | 15.5           |
| Rarely, %                             | 13.2           | 31.5           |
| 1-6 times per week, %                 | 39.6           | 39.4           |
| Daily, %                              | 30.7           | 11.7           |
| More than daily, %                    | 3.0            | 1.9            |
| Menopausal status                     |                |                |
| Had period, %                         | -              | 0.5            |
| No period, %                          | -              | 97.2           |
| Period induced by hormone, %          | -              | 1.9            |

Abbreviations: BMI, body mass index; MET, metabolic equivalent task.

Values are mean (standard deviation) unless noted as %.

<sup>a</sup> Not age-adjusted.

**eTable 3.** Representative Food Items for Food Groups Included in the Sulfur Microbial Diet Score

| <b>Food groups</b>        | <b>Representative food items</b>                                                                                                                             |
|---------------------------|--------------------------------------------------------------------------------------------------------------------------------------------------------------|
| Low-calorie beverages     | Low-energy cola, other low-energy carbonated beverage                                                                                                        |
| French fries              | French fries                                                                                                                                                 |
| Red meats                 | Beef, pork, lamb, hamburger                                                                                                                                  |
| Processed meats           | Processed meats, bacon, hot dogs                                                                                                                             |
| Liquor                    | Liquor                                                                                                                                                       |
| Butter                    | Butter                                                                                                                                                       |
| High-fat dairy products   | Whole milk, cream, sour cream, ice cream, cream cheese, other cheese                                                                                         |
| Coffee                    | Coffee                                                                                                                                                       |
| Sugar-sweetened beverages | Cola with sugar, other carbonated beverages with sugar, fruit drinks                                                                                         |
| Desserts                  | Chocolate bars or pieces, candy bars, cookies, brownies, doughnuts, cake, pie, sweet roll, coffee cake, pastry                                               |
| Tomato                    | Tomatoes, tomato juice, tomato sauce                                                                                                                         |
| Fruit juice               | Apple juice or cider, orange juice, grapefruit juice, other fruit juice                                                                                      |
| Poultry                   | Chicken or turkey with or without skin                                                                                                                       |
| Low-fat dairy products    | Skim or low-fat milk, sherbet or ice milk, yogurt                                                                                                            |
| Salad dressing            | Oil and vinegar salad dressing                                                                                                                               |
| Beer                      | Beer                                                                                                                                                         |
| Nuts                      | Peanuts, other nuts, peanut butter                                                                                                                           |
| Fish                      | Canned tuna fish, dark-meat fish, other fish, shrimp, lobster, scallops                                                                                      |
| Other vegetables          | Celery, mushrooms, green pepper, corn, mixed vegetables, eggplant, summer squash                                                                             |
| Cruciferous vegetables    | Broccoli; coleslaw and uncooked cabbage; cooked cabbage; cauliflower; Brussels sprouts; kale, mustard, and chard greens; sauerkraut                          |
| Leafy vegetables          | Spinach, iceberg or head lettuce, romaine or leaf lettuce                                                                                                    |
| Legumes                   | String beans, peas or lima beans, beans or lentils, tofu or soybeans, alfalfa sprouts                                                                        |
| Whole grains              | Cooked oatmeal, other cooked breakfast cereal, dark bread, brown rice, other grains, bran added to food, wheat germ                                          |
| Yellow vegetables         | Carrots, yellow (winter) squash, yams                                                                                                                        |
| Fruits                    | Raisins or grapes, avocado, bananas, cantaloupe, watermelon, fresh apples or pears, oranges, grapefruit, strawberries, blueberries, peaches, apricots, plums |

**eTable 4.** Age-Adjusted Baseline Dietary Intakes in Servings per Week Among Men (Health Professionals Follow-up Study [HPFS]) and Women (Nurses' Health Study [NHS] and Nurses' Health Study II [NHS2]) by Quintiles of Sulfur Microbial Diet Score<sup>a</sup>

|                           | Men (HPFS)  |             |           |             |             | Women (NHS and NHSII) |             |             |             |             |
|---------------------------|-------------|-------------|-----------|-------------|-------------|-----------------------|-------------|-------------|-------------|-------------|
|                           | Q1          | Q2          | Q3        | Q4          | Q5          | Q1                    | Q2          | Q3          | Q4          | Q5          |
| Low-calorie beverages     | 2.2 (4.3)   | 2.4 (4.4)   | 2.8 (4.7) | 3.3 (5.4)   | 6.6 (10.6)  | 4.3 (6.8)             | 4.5 (6.7)   | 4.9 (7.3)   | 5.6 (8.1)   | 10.1 (12.9) |
| French fries              | 0.3 (0.6)   | 0.5 (0.7)   | 0.6 (0.8) | 0.8 (0.9)   | 1.4 (1.5)   | 0.3 (0.5)             | 0.4 (0.5)   | 0.5 (0.6)   | 0.6 (0.7)   | 1.1 (1.2)   |
| Red meats                 | 2.9 (2.6)   | 3.6 (2.7)   | 4.1 (2.7) | 4.7 (2.9)   | 6.3 (4)     | 4.1 (3.2)             | 4.8 (3.2)   | 5.2 (3.3)   | 5.6 (3.5)   | 7.2 (4.4)   |
| Processed meats           | 1.4 (2)     | 2 (2.3)     | 2.5 (2.4) | 2.9 (2.7)   | 4.3 (4.4)   | 1.2 (1.5)             | 1.5 (1.7)   | 1.8 (1.8)   | 2 (2)       | 2.8 (3)     |
| Liquor                    | 1.2 (3.1)   | 1.8 (4)     | 2.2 (4.4) | 2.9 (5.5)   | 4.5 (7.8)   | 0.4 (1.5)             | 0.6 (2)     | 0.7 (2.2)   | 0.9 (2.8)   | 1.5 (4.4)   |
| Butter                    | 1.2 (3.3)   | 1.6 (3.8)   | 1.8 (4)   | 2.2 (4.7)   | 3.2 (6.3)   | 1.4 (3.5)             | 1.5 (3.7)   | 1.7 (4)     | 1.9 (4.4)   | 2.7 (5.7)   |
| High-fat dairy products   | 5.4 (6)     | 6.2 (6.4)   | 6.7 (6.6) | 7.2 (7.4)   | 8.5 (9)     | 6.4 (6.1)             | 6.7 (6.2)   | 6.8 (6.5)   | 7 (7)       | 7.8 (8.2)   |
| Coffee                    | 24.2 (20.7) | 27.7 (20.7) | 29.5 (20) | 31.4 (19.9) | 33.7 (20.1) | 13 (12.2)             | 13.3 (12.2) | 13.6 (12.4) | 13.9 (12.7) | 14.1 (13.7) |
| Sugar-sweetened beverages | 1.7 (3.3)   | 2.1 (3.5)   | 2.3 (3.6) | 2.8 (4.4)   | 3.3 (5.4)   | 1.9 (3.9)             | 2.3 (4.3)   | 2.6 (4.8)   | 3.1 (5.5)   | 3.9 (6.8)   |
| Desserts                  | 6.4 (7.9)   | 7.3 (8.3)   | 7.4 (8.2) | 7.3 (7.8)   | 7.9 (8.6)   | 6.5 (7)               | 7.1 (7.3)   | 7.2 (7.3)   | 7.3 (7.3)   | 7.9 (8)     |
| Tomato                    | 5.9 (4.9)   | 4.6 (3.4)   | 4 (2.8)   | 3.5 (2.8)   | 3.2 (2.8)   | 5.1 (3.9)             | 3.9 (2.9)   | 3.4 (2.6)   | 3 (2.4)     | 2.6 (2.3)   |
| Fruit juice               | 7.7 (8)     | 6.3 (6.1)   | 5.4 (5.2) | 4.7 (4.8)   | 3.9 (4.5)   | 16.5 (9.1)            | 10.7 (5.4)  | 8.2 (4.5)   | 6 (3.8)     | 4.2 (3.4)   |
| Poultry                   | 3.1 (2.5)   | 2.7 (2)     | 2.4 (1.8) | 2.1 (1.6)   | 1.9 (1.6)   | 5.7 (4)               | 4.8 (3)     | 4.1 (2.8)   | 3.6 (2.5)   | 3.2 (2.5)   |

|                        |             |            |           |           |           |            |            |           |           |           |
|------------------------|-------------|------------|-----------|-----------|-----------|------------|------------|-----------|-----------|-----------|
| Low-fat dairy products | 9.7 (8.8)   | 8 (7.7)    | 6.8 (7)   | 5.7 (6.5) | 4.5 (5.9) | 11.9 (8.7) | 9.7 (7.7)  | 8 (7.2)   | 6.4 (6.5) | 4.7 (5.7) |
| Salad dressing         | 2.6 (3.7)   | 2 (2.6)    | 1.6 (2.2) | 1.3 (1.8) | 1 (1.6)   | 3.2 (4)    | 2.3 (2.8)  | 1.8 (2.4) | 1.4 (1.9) | 1.1 (1.7) |
| Beer                   | 1.7 (3.9)   | 2 (4.5)    | 2.1 (4.7) | 2.1 (4.6) | 1.9 (4.3) | 0.7 (2.4)  | 0.7 (2.5)  | 0.7 (2.6) | 0.7 (2.3) | 0.6 (1.9) |
| Nuts                   | 4.8 (6.6)   | 3.8 (5)    | 3.2 (4.2) | 2.8 (3.5) | 2.6 (3.6) | 1.9 (2.8)  | 1.4 (1.9)  | 1.2 (1.6) | 1 (1.4)   | 0.8 (1.2) |
| Fish                   | 4.2 (3.2)   | 3.2 (2.3)  | 2.7 (1.9) | 2.2 (1.6) | 1.9 (1.6) | 3.1 (2.5)  | 2.3 (1.7)  | 1.9 (1.4) | 1.6 (1.2) | 1.3 (1.2) |
| Other vegetables       | 5.8 (4.4)   | 4.1 (2.9)  | 3.3 (2.3) | 2.8 (2)   | 2.3 (1.8) | 7.4 (5.3)  | 5 (3.2)    | 4 (2.6)   | 3.3 (2.3) | 2.8 (2.1) |
| Cruciferous vegetables | 4.2 (3.6)   | 2.7 (2.1)  | 2.1 (1.7) | 1.7 (1.4) | 1.4 (1.3) | 5.3 (4.3)  | 3.4 (2.3)  | 2.7 (1.9) | 2.2 (1.7) | 1.8 (1.5) |
| Leafy vegetables       | 8.2 (6.4)   | 5.9 (3.8)  | 4.8 (3.2) | 3.9 (2.8) | 3.3 (2.7) | 8.9 (6.6)  | 5.9 (3.9)  | 4.8 (3.3) | 3.8 (2.8) | 3 (2.5)   |
| Legumes                | 5 (3.6)     | 3.4 (2.2)  | 2.8 (1.8) | 2.4 (1.7) | 2.1 (1.6) | 4.3 (3.2)  | 2.9 (1.9)  | 2.5 (1.6) | 2.1 (1.5) | 1.7 (1.4) |
| Whole grains           | 18.6 (13.3) | 11.9 (8.5) | 8.8 (6.9) | 6.5 (5.8) | 4.5 (5)   | 14.3 (9.8) | 9.5 (7)    | 6.8 (5.6) | 4.8 (4.5) | 3.2 (3.7) |
| Yellow vegetables      | 0.7 (1.1)   | 0.3 (0.4)  | 0.2 (0.3) | 0.2 (0.3) | 0.1 (0.2) | 5.3 (4.5)  | 2.9 (2)    | 2 (1.5)   | 1.5 (1.2) | 1 (1)     |
| Fruits                 | 20.5 (12.3) | 13.1 (6.8) | 9.9 (5.5) | 7.5 (4.9) | 5.4 (4.4) | 16.5 (9.1) | 10.7 (5.4) | 8.2 (4.5) | 6 (3.8)   | 4.2 (3.4) |

<sup>a</sup> Food groups are ordered based on weights in the sulfur microbial diet score in descending order.

**eTable 5.** Hazard Ratios (HR) and 95% Confidence Intervals (CI) of Colorectal Cancer Incidence in Men [Health Professionals Follow-up Study (HPFS)] and Women [Nurses' Health Study (NHS) and Nurses' Health Study II (NHS2)] by Quintiles of Sulfur Microbial Diet Score<sup>a</sup>

| Model                               | Sulfur microbial diet score (quintile) |                  |                  |                  |                  | P-trend <sup>b</sup> |
|-------------------------------------|----------------------------------------|------------------|------------------|------------------|------------------|----------------------|
|                                     | Q1 (lowest)                            | Q2               | Q3               | Q4               | Q5 (highest)     |                      |
| <b>Men (HPFS)</b>                   |                                        |                  |                  |                  |                  |                      |
| Cases                               | 232                                    | 247              | 220              | 216              | 222              |                      |
| Person-years                        | 206,635                                | 209,173          | 204,043          | 200,375          | 191,366          |                      |
| Age-adjusted <sup>c</sup>           | 1 [ref.]                               | 1.14 (0.95-1.37) | 1.13 (0.94-1.36) | 1.24 (1.02-1.49) | 1.60 (1.32-1.94) | <.001                |
| Multivariable-adjusted <sup>d</sup> | 1 [ref.]                               | 1.11 (0.93-1.34) | 1.09 (0.90-1.32) | 1.16 (0.95-1.41) | 1.45 (1.18-1.77) | .001                 |
| <b>Women (NHS and NSII)</b>         |                                        |                  |                  |                  |                  |                      |
| Cases                               | 418                                    | 444              | 422              | 420              | 374              |                      |
| Person-years                        | 877,275                                | 882,514          | 868,469          | 843,772          | 794,426          |                      |
| Age-adjusted <sup>c</sup>           | 1 [ref.]                               | 1.12 (0.98-1.28) | 1.15 (1.00-1.31) | 1.24 (1.08-1.43) | 1.33 (1.15-1.54) | <.001                |
| Multivariable-adjusted <sup>d</sup> | 1 [ref.]                               | 1.09 (0.95-1.24) | 1.09 (0.95-1.26) | 1.16 (1.00-1.34) | 1.18 (1.01-1.37) | .02                  |

<sup>a</sup> The Cochran's Q test for heterogeneity between men and women yielded a *p*-value of 0.17 in age-adjusted model and multivariable-adjusted model.

<sup>b</sup> Trend test was performed using median value of each diet score quintile as a continuous variable.

<sup>c</sup> Models were stratified by age, questionnaire cycle, and cohort.

<sup>d</sup> Models were stratified by age, questionnaire cycle, cohort, and adjusted for the following covariates: race, body mass index, family history of colorectal cancer, physical activity, smoking status, smoking packyears, menopausal hormone use (women only), aspirin use, non-steroid anti-inflammatory drug use, prior endoscopy, recent physical examination, and total calorie intake.



**eTable 6.** Multivariable-Adjusted Association Between the Sulfur Microbial Diet Score and Colorectal Cancer Incidence in the Pooled Analytic Cohort of Health Professionals Follow-up Study (HPFS), Nurses' Health Study (NHS), and Nurses' Health Study II (NHS2), With Additional Adjustment for the Western Dietary Pattern Score

|                                                     | Sulfur microbial diet score (quintile) |                  |                  |                  |                  | P-trend <sup>a</sup> |
|-----------------------------------------------------|----------------------------------------|------------------|------------------|------------------|------------------|----------------------|
|                                                     | Q1 (lowest)                            | Q2               | Q3               | Q4               | Q5 (highest)     |                      |
| Hazard ratio (95% confidence interval) <sup>b</sup> | 1 [ref.]                               | 1.08 (0.97-1.21) | 1.07 (0.95-1.21) | 1.13 (0.99-1.28) | 1.21 (1.05-1.40) | .01                  |

<sup>a</sup> Trend test was performed using median value of each diet score quintile as a continuous variable.

<sup>b</sup> Models were stratified by age, questionnaire cycle, cohort, and adjusted for the following covariates: race, body mass index, family history of colorectal cancer, physical activity, smoking status, smoking packyears, menopausal hormone use (women only), aspirin use, non-steroid anti-inflammatory drug use, prior endoscopy, recent physical examination, total calorie intake, and the Western dietary pattern score, which was derived using principal component analysis.
